# Supplementary material for: The inflammatory microenvironment of the lung at the time of infection governs innate control of SARS-CoV-2 replication
Source: PubMed Central journal article supplement (PMC10996686; doi:10.1101/2024.03.27.586885), 2024-03-27

Baker et al. Figure S1

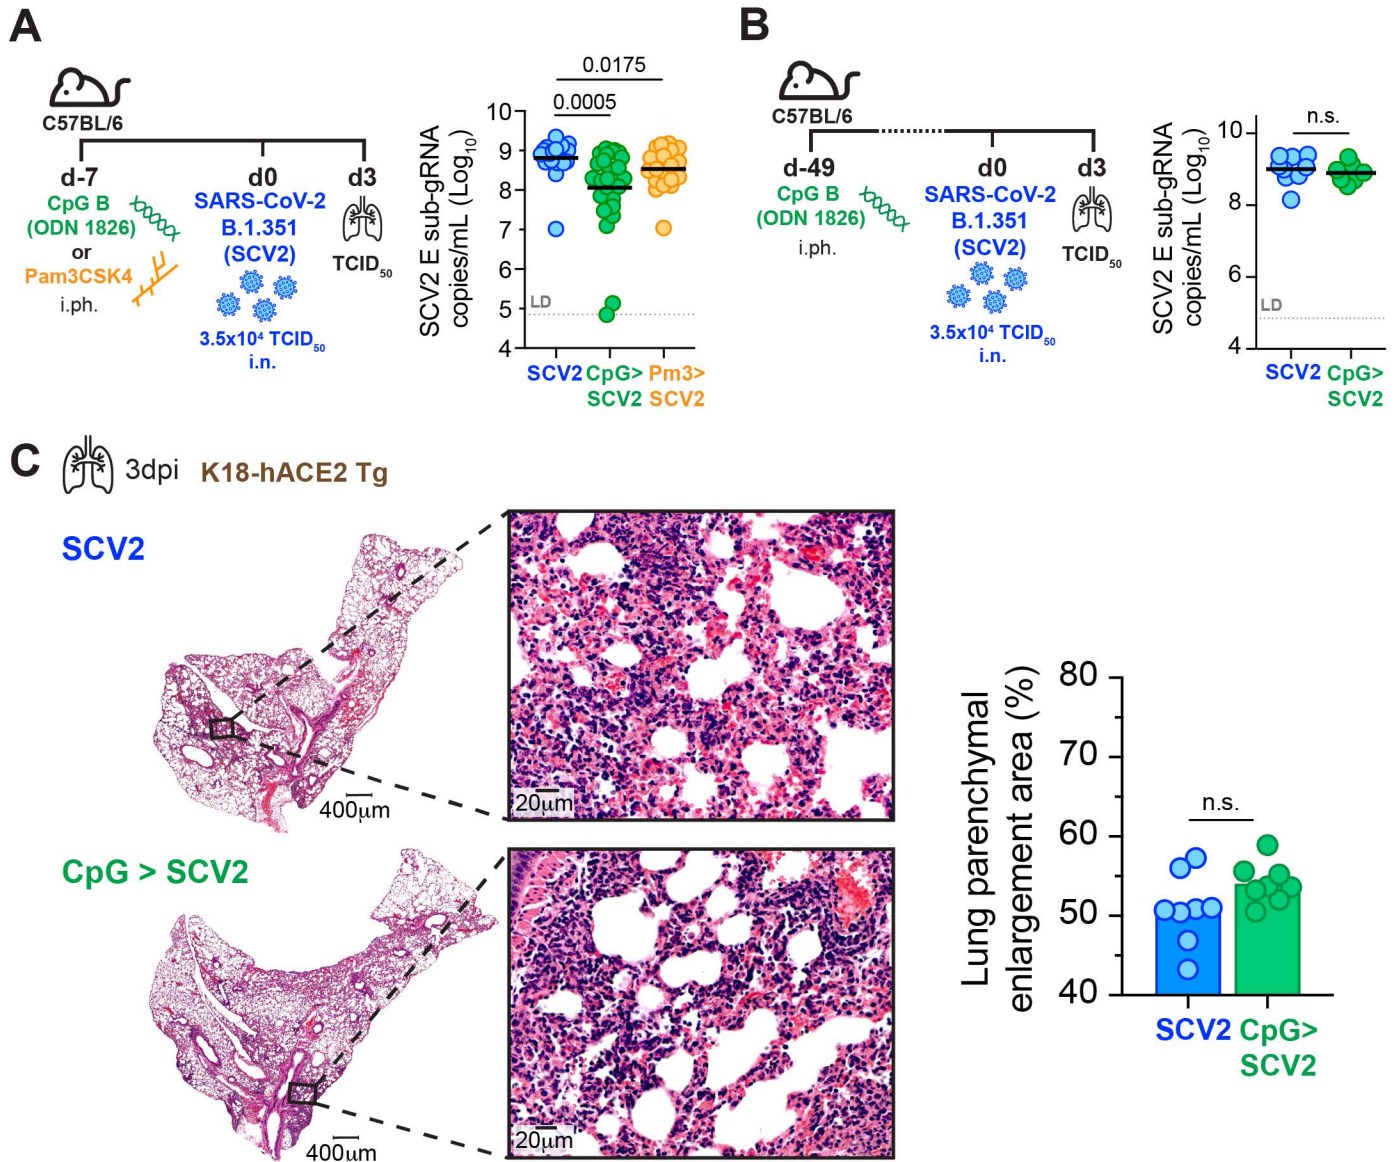

Baker et al. Figure S2

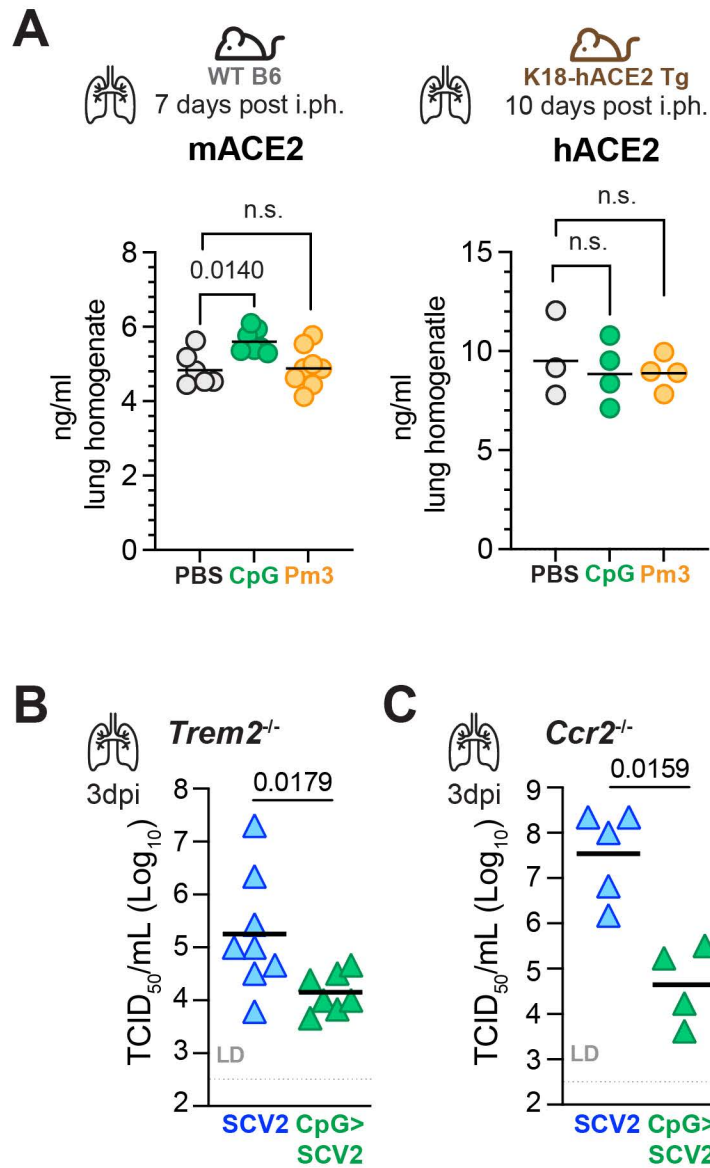

Baker et al. Figure S3

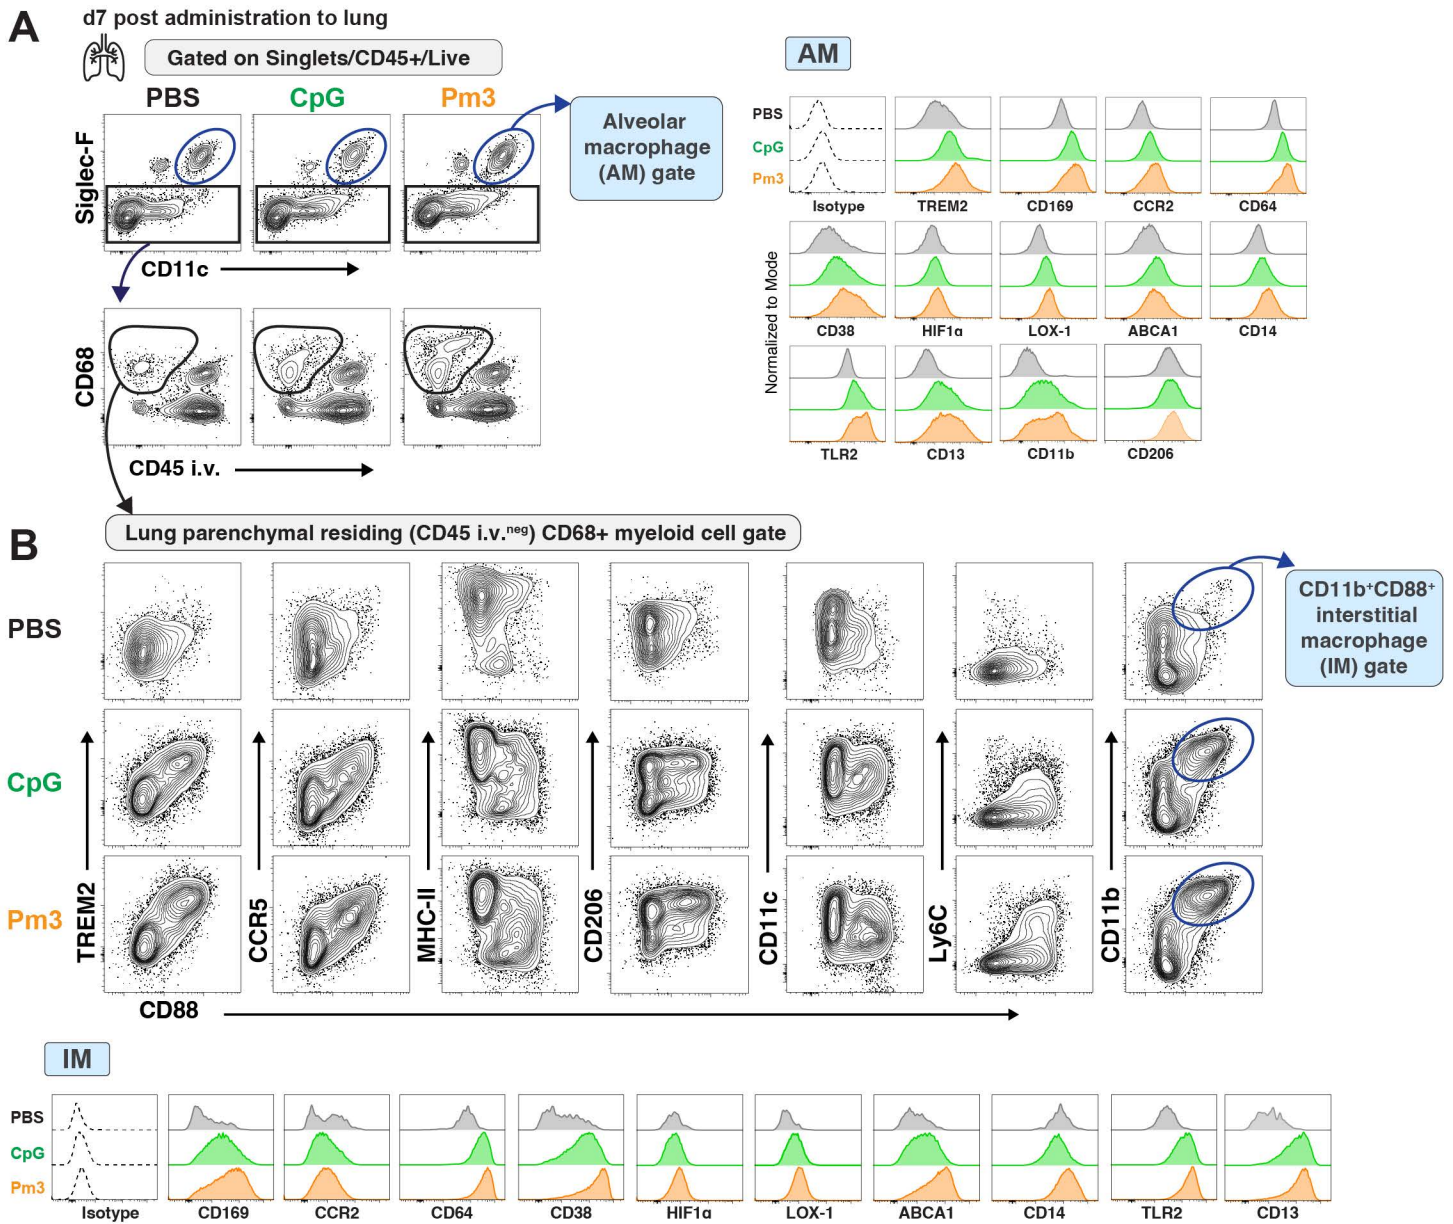

Baker et al. Figure S4

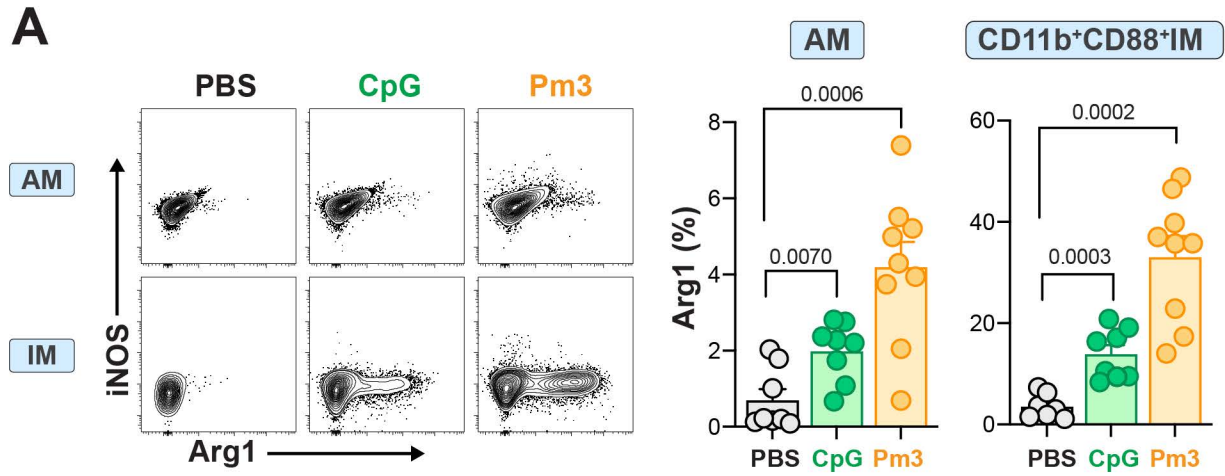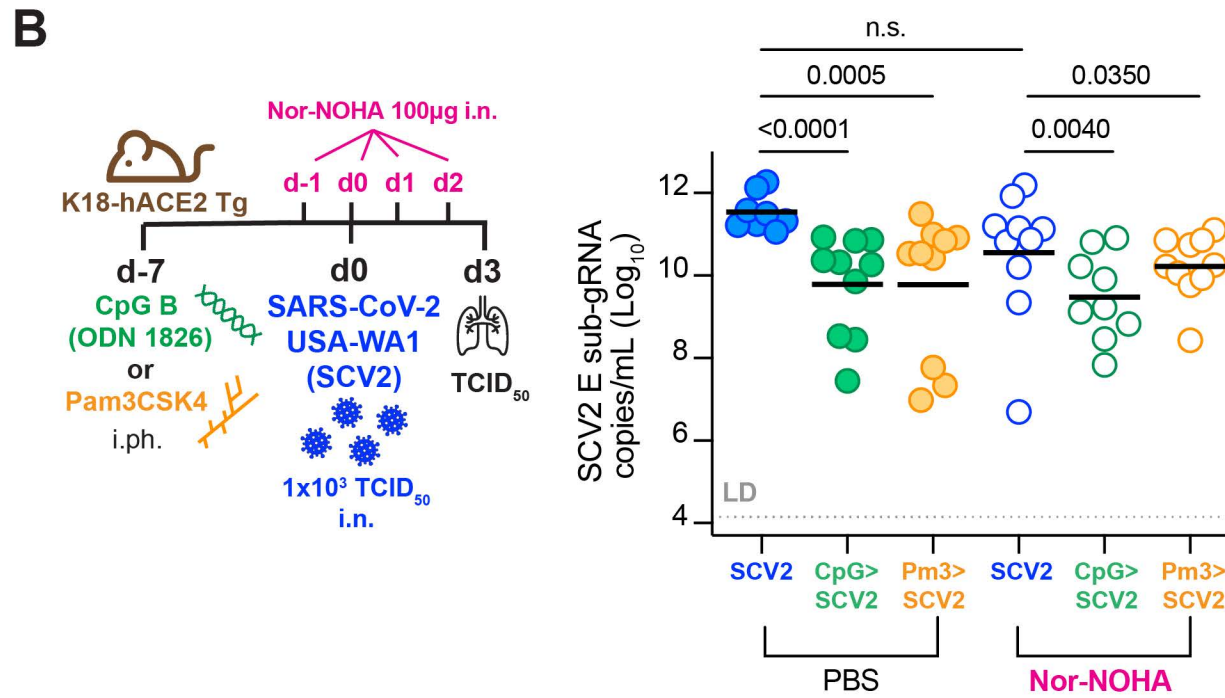

Baker et al. Figure S5

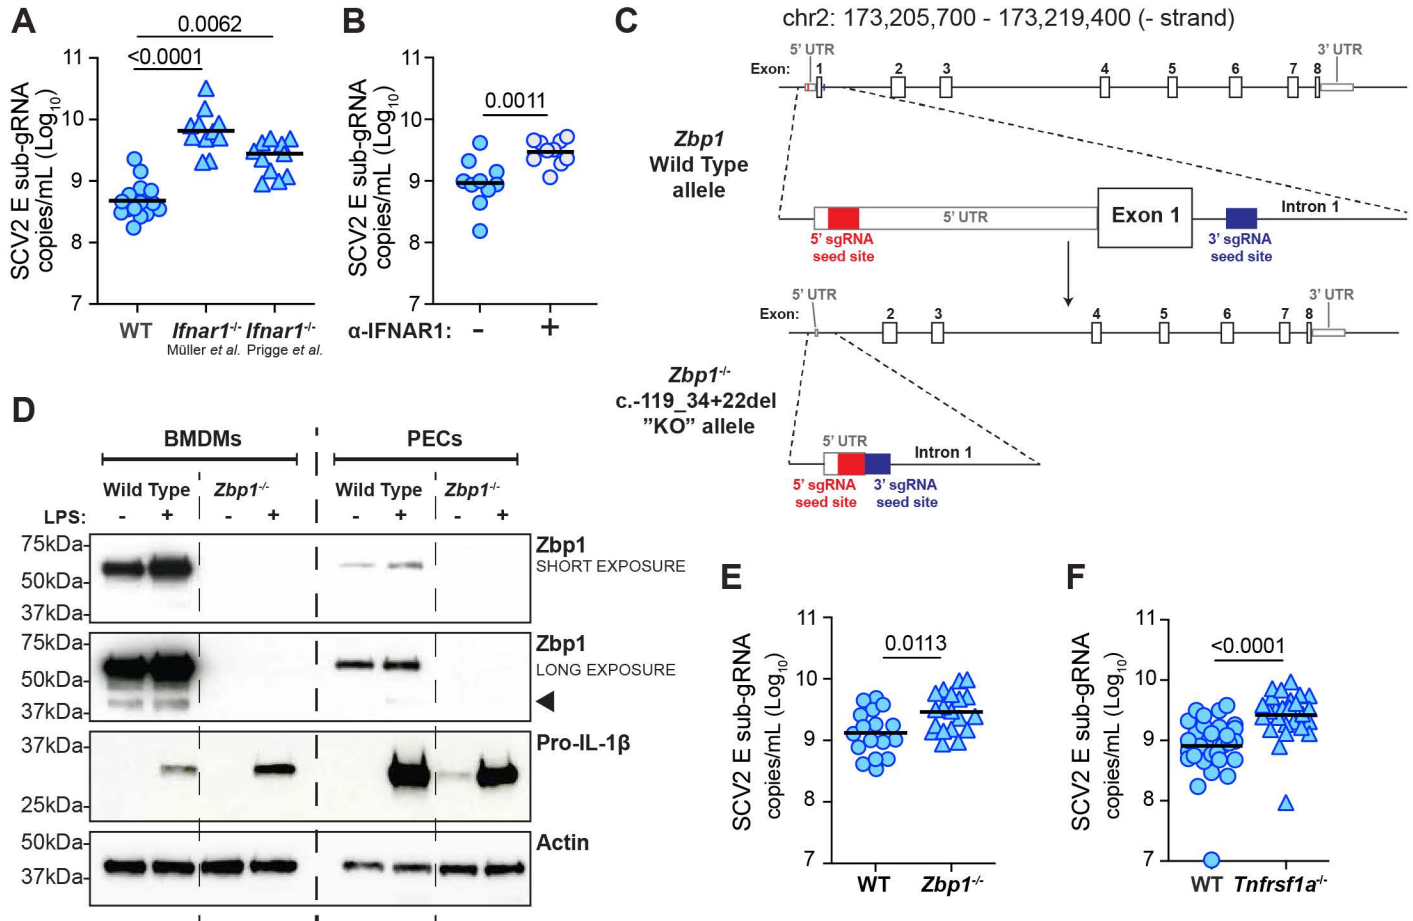

Baker et al. Figure S6

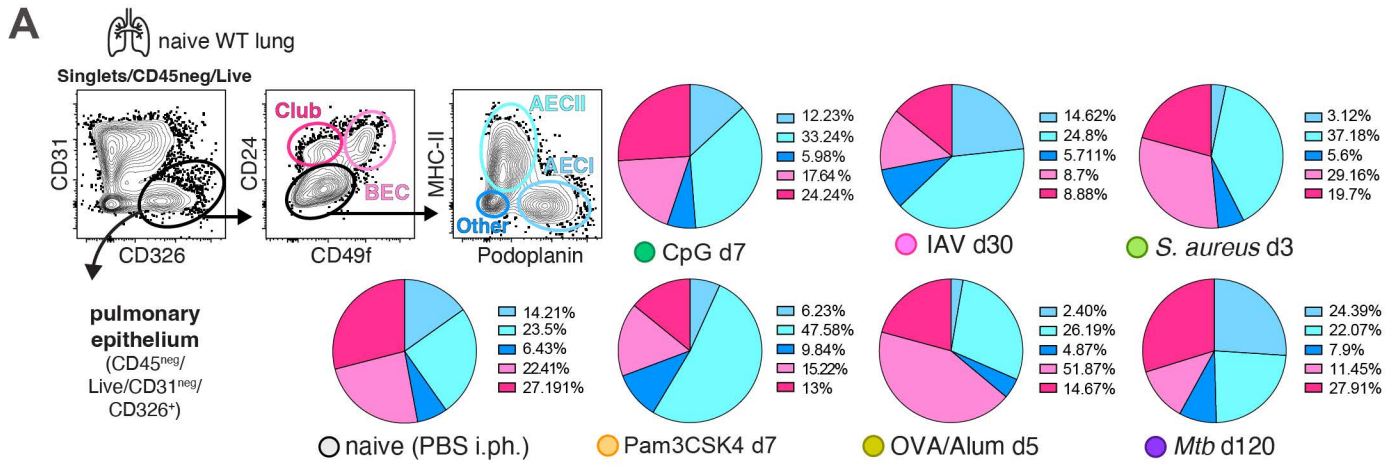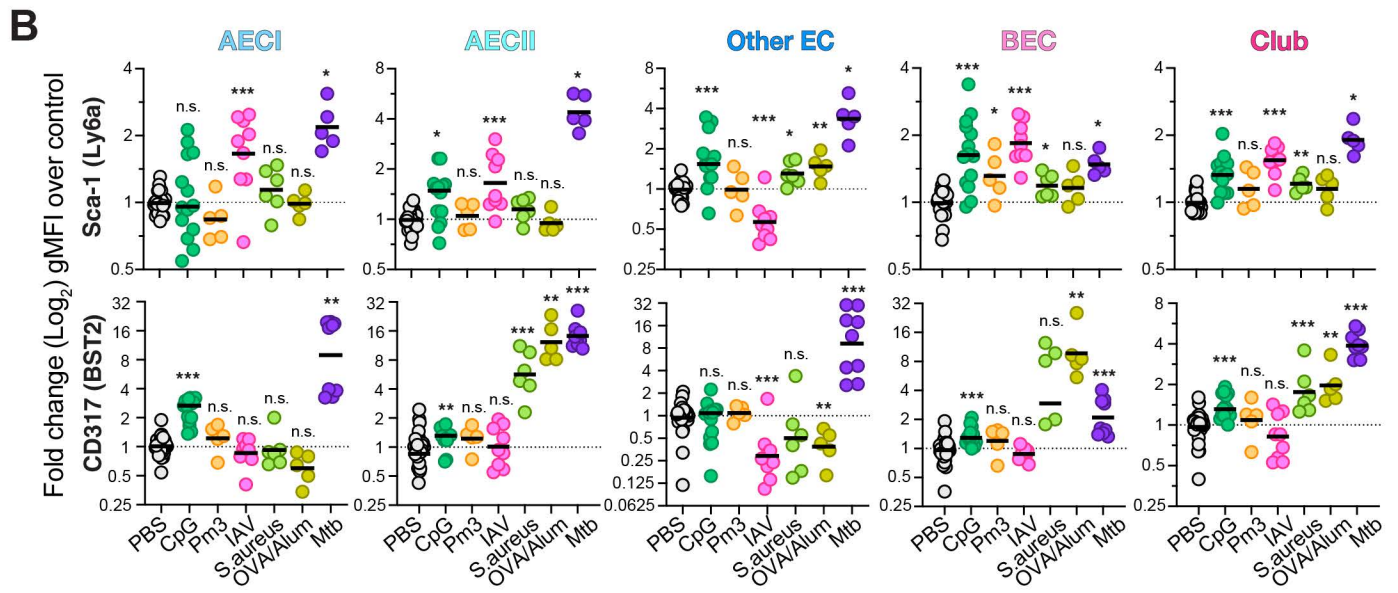

Supplement: NIHPP2024.03.27.586885v1-supplement-1.pdf [file NIHPP2024.03.27.586885v1-supplement-1.pdf]
